# Supplementary material for: Standardized Treatment of Active Tuberculosis in Patients with Previous Treatment and/or with Mono-resistance to Isoniazid: A Systematic Review and Meta-analysis
Source: PLoS Med. 2009 Sep 15;6(9):e1000150. doi: 10.1371/journal.pmed.1000150 (PMC2736403; doi:10.1371/journal.pmed.1000150)
Supplement: Table S1 — Summary of randomized trials pooled for analysis of isoniazid resistance. (0.11 MB PDF) [file pmed.1000150.s002.pdf]

**Table S1: Summary of randomized trials pooled for analysis of isoniazid resistance**

| Ref.                                                                                  | Author              | Year<br>study<br>began | Country    | Total<br>treated<br>(N) | Male<br>(%) | Age of<br>Participants | Outcomes measured |         |     |
|---------------------------------------------------------------------------------------|---------------------|------------------------|------------|-------------------------|-------------|------------------------|-------------------|---------|-----|
|                                                                                       |                     |                        |            |                         |             |                        | Failure           | Relapse | ADR |
| <b>9 RCT in previously treated cases with isoniazid mono-resistance</b>               |                     |                        |            |                         |             |                        |                   |         |     |
| [1]                                                                                   | HKTBS, BMRC         | 1970                   | Hong Kong  | 205                     | 77          | 18 and up              | Y                 | N       | Y   |
| [2]                                                                                   | Sriyabhaya          | 1974                   | Thailand   | 72                      | 76          | 18 and up              | Y                 | Y       | N   |
| [3–6]                                                                                 | Zierski             | 1976                   | Poland     | 170                     | NS          | NotStated              | Y                 | Y       | N   |
| [7]                                                                                   | Babu Swai           | 1978                   | India      | 198                     | 72          | 18 and up              | Y                 | Y       | Y   |
| [8]                                                                                   | Hong                | 1978                   | Korea      | 440                     | 78          | 18 and up              | Y                 | Y       | Y   |
| [9]                                                                                   | Castelo *#          | 1984                   | Brazil     | 13                      | 62          | 18 and up              | Y                 | Y       | Y   |
| [10]                                                                                  | Abdul Aziz *        | 1986                   | Pakistan   | 30                      | 75          | NotStated              | Y                 | Y       | N   |
| [11]                                                                                  | Narayanan #         | 1990                   | India      | 171                     | 76          | 12 and up              | Y                 | Y       | Y   |
| [12]                                                                                  | ICMR, Chennai *#    | 1995                   | India      | 243                     | 67          | 12 and up              | Y                 | Y       | Y   |
| * Studies where patients with INH mono-resistance were a sub-group of all randomized. |                     |                        |            |                         |             |                        |                   |         |     |
| # Studies included previously treated and untreated patients                          |                     |                        |            |                         |             |                        |                   |         |     |
| <b>24 RCT in New cases: subgroups with isoniazid mono-resistance</b>                  |                     |                        |            |                         |             |                        |                   |         |     |
| [13]                                                                                  | Figueiredo          | 1970                   | Brazil     | 20                      | NS          | NotStated              | Y                 | Y       | N   |
| [14,15]                                                                               | Singapore/BMRC      | 1972                   | Singapore  | 6                       | 72          | NotStated              | Y                 | Y       | Y   |
| [16,17]                                                                               | E Africa/BMRC       | 1974                   | E Africa   | 42                      | 62          | 18 and up              | Y                 | Y       | Y   |
| [18,19]                                                                               | HK/BMRC             | 1974                   | Hong Kong  | 47                      | 71          | 18 and up              | Y                 | Y       | Y   |
| [20–22]                                                                               | Singapore/BMRC      | 1975                   | Singapore  | 11                      | 65          | 18 and up              | Y                 | Y       | Y   |
| [23,24]                                                                               | EA, BMRC            | 1976                   | Many       | 57                      | 67          | 18 and up              | Y                 | Y       | N   |
| [25–27]                                                                               | HK/BMRC             | 1977                   | Hong Kong  | 40                      | 72          | 18 and up              | Y                 | Y       | Y   |
| [28]                                                                                  | Algeria/BMRC        | 1977                   | Algeria    | 13                      | 44          | 18 and up              | Y                 | Y       | Y   |
| [29]                                                                                  | Mazouni             | 1977                   | Algeria    | 26                      | NS          | NotStated              | Y                 | Y       | N   |
| [30,31]                                                                               | E&C Africa/BMRC     | 1978                   | E&C Africa | 40                      | 65          | 18 and up              | Y                 | Y       | Y   |
| [32]                                                                                  | Tanzania/BMRC       | 1978                   | Tanzania   | 15                      | 71          | 18 and up              | Y                 | Y       | Y   |
| [33]                                                                                  | HK/Madras BMRC      | 1978                   | Hong Kong  | 7                       | 67          | 18 and up              | Y                 | Y       | Y   |
| [34,35]                                                                               | Singapore BMRC      | 1979                   | Singapore  | 9                       | 60          | 18 and up              | Y                 | Y       | Y   |
| [36,37]                                                                               | Zierski             | 1979                   | Poland     | 13                      | 71          | 18 and up              | Y                 | Y       | Y   |
| [38]                                                                                  | Tripathy            | 1979                   | India      | 19                      | NS          | 12 and up              | Y                 | N       | N   |
| [39]                                                                                  | HK/Madras/BMRC      | 1980                   | Hong Kong  | 12                      | 100         | 18 and up              | Y                 | Y       | Y   |
| [40]                                                                                  | Kenya/Zambia/BMRC   | 1981                   | E Africa   | 42                      | 72          | 18 and up              | Y                 | Y       | Y   |
| [41]                                                                                  | Algeria/BMRC        | 1981                   | Algeria    | 21                      | 65          | 18 and up              | Y                 | Y       | Y   |
| [42]                                                                                  | HK/ BMRC            | 1983                   | Hong Kong  | 59                      | 65          | 18 and up              | Y                 | Y       | Y   |
| [43]                                                                                  | HK/Singapore/BMRC   | 1983                   | Singapore  | 4                       | 66          | 18 and up              | Y                 | Y       | Y   |
| [44,45]                                                                               | HKCS, BMRC          | 1984                   | Hong Kong  | 6                       | 74          | 18 and up              | Y                 | Y       | Y   |
| [46,47]                                                                               | TBRC Madras         | 1985                   | India      | 36                      | 70          | 12 and up              | Y                 | Y       | Y   |
| [48]                                                                                  | Agounitane*         | 1990                   | Algeria    | 13                      | NS          | 0 to 80                | Y                 | Y       | Y   |
| [29,49]                                                                               | Chaulet & Mazouni * | 1995                   | Algeria    | 10                      | 74          | 18 and up              | Y                 | Y       | Y   |

\*These two studies were published in French, all others published in English.

NS: Not stated

## Reference List

1. Hong Kong Tuberculosis Treatment Services, Brompton Hospital, British Medical Research Council (1974) A controlled clinical trial of daily and intermittent regimens of rifampicin plus ethambutol in the retreatment of patients with pulmonary tuberculosis in Hong Kong. *Tuberc* 55: 1-27.
2. Sriyabhaya N, Jittinandana A, Kecharanantana P (1974) Ambulatory intermittent rifampicin and ethambutol in the retreatment of pulmonary tuberculosis. *J Med Ass Thailand* 57: 550.
3. Zierski M, Bek E, Bergson H, Kucharska A, Szelagowicz B (1976) Retreatment of chronic pulmonary tuberculosis with regimens including high and low doses of rifampicin in the intermittent phase recent and late results - a controlled comparison study. *Bull Int Union Tuberc* 51: 121-126.
4. National Research Institute for Tuberculosis Poland (1976) A comparative study of daily followed by twice- or once-weekly regimens of ethambutol and rifampicin in the retreatment of patients with pulmonary tuberculosis: second report. *Tuberc* 57: 105-113.
5. National Research Institute for Tuberculosis Poland (1975) A comparative study of daily followed by twice or once weekly regimens of ethambutol and rifampicin in retreatment of patients with pulmonary tuberculosis. *Tuberc* 56: 1.
6. Zierski M (1973) A trial of intermittent rifampicin and ethambutol in retreatment regimens. *Scand J Resp Dis Suppl.* 84: 132-135.
7. Babu SO, Aluoch JA, Githui WA, Thiong'o R, Edwards EA, et al. (1988) Controlled clinical trial of a regimen of two durations for the treatment of isoniazid resistant pulmonary tuberculosis. *Tuberc* 69: 5-14.
8. Hong YP, Kim SC, Chang SC, Kim SJ, Jin BW, et al. (1988) Comparison of a daily and three intermittent retreatment regimens for pulmonary tuberculosis administered under programme conditions. *Tuberc* 69: 241-253.
9. Castelo A, Goihman S, Dalboni MA, Jardim J, Kalckman AS, et al. (1989) Comparison of daily and twice-weekly regimens to treat pulmonary tuberculosis. *Lancet* 334: 1173-1176.
10. Aziz A, Ishaq M, Jaffer NA, Akhwand R, Bhatti AH (1986) Clinical trial of two short-course (6-month) regimens and a standard regimen (12-month) chemotherapy in retreatment of pulmonary tuberculosis in Pakistan. *Am Rev Resp Dis* 134: 1056-1061.

11. Narayanan PR, Tuberculosis Research Centre Chennai (2004) Split-drug regimens for the treatment of patients with sputum smear-positive pulmonary tuberculosis--a unique approach. *Trop Med Int Health* 9: 551-558.
12. Tuberculosis Research Centre, Indian Council of Medical Research (1997) A controlled clinical trial of oral short-course regimens in the treatment of sputum-positive pulmonary tuberculosis. *Int J Tuber Lung Dis* 1: 509-517.
13. Poppe de Figueiredo F, Alves Brito A, Laborne Valle JH, Martins Tavares P, Linhares Trannin P (1974) Short duration chemotherapy of pulmonary tuberculosis: a pilot trial. *Bull Int Union Against Tuberculosis* 49: 382.
14. Singapore Tuberculosis Service-British Medical Research Council (1977) Controlled trial of intermittent regimens of rifampin plus isoniazid for pulmonary tuberculosis in Singapore. The results up to 30 months. *Am Rev Respir Dis* 116: 807-820.
15. Singapore Tuberculosis Service, British Medical Research Council (1975) Controlled trial of intermittent regimens of rifampicin plus isoniazid for pulmonary tuberculosis in Singapore. *Lancet* 306: 1105-1109.
16. Third East African-British Medical Research Councils (1978) Controlled clinical trial of four short-course regimens of chemotherapy for two durations in the treatment of pulmonary tuberculosis: first report. *Am Rev Respir Dis* 118: 39-48.
17. Third East African-British Medical Research Council (1980) Controlled clinical trial of four short-course regimens of chemotherapy for two durations in the treatment of pulmonary tuberculosis. Second report. *Tuberc* 61: 59-69.
18. Hong Kong Chest Service and British Medical Research Council (1978) Controlled trial of 6-month and 8-month regimens in the treatment of pulmonary tuberculosis. First report. *Am Rev Respir Dis* 118: 219-228.
19. Hong Kong Chest Service and British Medical Research Council (1979) Controlled trial of 6-month and 8-month regimens in the treatment of pulmonary tuberculosis: the results up to 24 months. *Tuberc* 60: 201-210.
20. Singapore Tuberculosis Service-British Medical Research Council (1979) Clinical trial of six-month and four-month regimens of chemotherapy in the treatment of pulmonary tuberculosis. *Am Rev Respir Dis* 119: 579-585.
21. Singapore Tuberculosis Service-British Medical Research Council (1981) Clinical trial of six-month and four-month regimens of chemotherapy in the treatment of pulmonary tuberculosis: the results up to 30 months. *Tuberc* 62: 95-102.

22. Singapore Tuberculosis Service-British Medical Research Council (1986) Long-term follow-up of a clinical trial of six-month and four-month regimens of chemotherapy in the treatment of pulmonary tuberculosis. *Am Rev Respir Dis* 133: 779-783.
23. East African and British Medical Research Councils (1978) Controlled clinical trial of five short-course (4-month) chemotherapy regimens in pulmonary tuberculosis. *Lancet* 334.
24. East African British Medical Research Councils (1981) Controlled clinical trial of five short-course (4 month) chemotherapy regimens in pulmonary tuberculosis. *Am Rev Respir Dis* 123: 165-170.
25. Hong Kong Chest-British Medical Research Council (1981) Controlled trial of four twice-weekly regimens and a daily regimen all given for 6 months for pulmonary tuberculosis. *Lancet* 317: 171-174.
26. Hong Kong Chest Service-British Medical Research Council (1982) Controlled trial of 4 three-times-weekly regimens and a daily regimen all given for 6 months for pulmonary tuberculosis. Second report: the results up to 24 months. *Tuberc* 63: 89-98.
27. Hong Kong Chest Service-British Medical Research Council (1987) Five-year follow-up of a controlled trial of five 6-month regimens of chemotherapy for pulmonary tuberculosis. *Am Rev Respir Dis* 136: 1339-1342.
28. Algerian working group-British Medical Research Council (1984) Controlled clinical trial comparing a 6-month and a 12-month regimen in the treatment of pulmonary tuberculosis in the Algerian Sahara. *Am Rev Respir Dis* 129: 921-928.
29. Mazouni L, Tazir M, Boulahbal F, Chaulet P (1985) Enquête contrôlée comparant trois régimes de chiniothérapie quotidienne de six mois dans la tuberculose pulmonaire, en pratique de routine à Alger. *Rev Mal Resp* 2: 209-214.
30. East and Central African-British Medical Research Council (1983) Controlled clinical trial of 4 short-course regimens of chemotherapy (three 6-month and one 8-month) for pulmonary tuberculosis. *Tuberc* 64: 153-166.
31. East and Central African-British Medical Research Council (1986) Controlled clinical trial of 4 short-course regimens of chemotherapy (three 6-month and one 8-month) for pulmonary tuberculosis: final report. *Tuberc* 67: 5-15.
32. Tanzania-British Medical Research Council (1985) Controlled clinical trial of two 6-month regimens of chemotherapy in the treatment of pulmonary tuberculosis. *Am Rev Respir Dis* 131: 727-731.

33. Hong Kong Chest Service-Tuberculosis Research Centre Madras-British Medical Research Council (1989) A controlled trial of 3-month, 4-month, and 6-month regimens of chemotherapy for sputum-smear-negative pulmonary tuberculosis. Results at 5 years. *Am Rev Respir Dis* 139: 871-876.
34. Singapore Tuberculosis Service-British Medical Research Council (1985) Clinical trial of three 6-month regimens of chemotherapy given intermittently in the continuation phase in the treatment of pulmonary tuberculosis. *Am Rev Respir Dis* 132: 374-378.
35. Singapore Tuberculosis Service British Medical Research Council (1988) Five-year follow-up of a clinical trial of three 6-month regimens of chemotherapy given intermittently in the continuation phase in the treatment of pulmonary tuberculosis. *Am Rev Respir Dis* 137: 1147-1150.
36. Zierski M, Bek E, Long MW, Snider DE Jr (1980) Short-course (6 month) cooperative tuberculosis study in Poland: results 18 months after completion of treatment. *Am Rev Respir Dis* 122: 879-889.
37. Zierski M, Bek E, Long MW, Snider DE Jr (1981) Short-course (6-month) cooperative tuberculosis study in Poland: results 30 months after completion of treatment. *Am Rev Respir Dis* 124: 249-251.
38. Tripathy SP (1979) Madras study of short-course chemotherapy in pulmonary tuberculosis. *Bull Int Union Tuberc* 54: 28-30.
39. Hong Kong Chest Service-Tuberculosis Research Centre MBMRC (1991) A controlled clinical comparison of 6 and 8 months of antituberculosis chemotherapy in the treatment of patients with silicotuberculosis in Hong Kong. *Am Rev Respir Dis* 143: 262-267.
40. Kenyan-Zambian-British Medical Research Council (1989) Controlled clinical trial of levamisole in short-course chemotherapy for pulmonary tuberculosis. *Am Rev Respir Dis* 140: 990-995.
41. Algerian Working Group British Medical Research Council Cooperative Study (1991) Short-course Chemotherapy for Pulmonary Tuberculosis under Routine Programme Conditions: a comparison of regimens of 28 and 36 weeks duration in Algeria. *Tuberc* 72: 88-100.
42. Hong Kong Chest Service-British Medical Research Council (1991) Controlled trial of 2, 4, and 6 months of pyrazinamide in 6-month, three-times-weekly regimens for smear-positive pulmonary tuberculosis, including an assessment of a combined preparation of isoniazid, rifampin, and pyrazinamide. Results at 30 months. *Am Rev Respir Dis* 143: 700-706.
43. Singapore Tuberculosis Service-British Medical Research Council (1991) Assessment of a daily combined preparation of isoniazid, rifampin, and

pyrazinamide in a controlled trial of three 6-month regimens for smear-positive pulmonary tuberculosis. *Am Rev Respir Dis* 143: 707-712.

44. Hong Kong Chest Service, Tuberculosis Research Centre M, British Medical Research Council (1984) A controlled trial of 2-month, 3-month, and 12-month regimens of chemotherapy for sputum-smear-negative pulmonary tuberculosis. *Am Rev Respir Dis* 130: 23-28.
45. Hong Kong Chest Service, Tuberculosis Research Centre M, British Medical Research Council (1981) A controlled trial of 2-month, 3-month, and 12-month regimens of chemotherapy for sputum smear-negative pulmonary tuberculosis: the results at 30 months. *Am Rev Respir Dis* 124: 138-142.
46. Tuberculosis Research Centre Madras (1986) A controlled clinical trial of 3- and 5-month regimens in the treatment of sputum-positive pulmonary tuberculosis in South India. *Am Rev Respir Dis* 134: 27-33.
47. Balasubramanian R, Sivasubramanian S, Vijayan VK, Ramachandran R, Jawahar MS, et al. (1990) Five year results of a 3-month and two 5-month regimens for the treatment of sputum-positive pulmonary tuberculosis in south India. *Tuberc* 71: 253-258.
48. Agounitane D, Chiheb M, Khaled S, Khaled NA, Boulahbal F, et al. (1990) Essai thérapeutique d'une combinaison de trois médicaments essentiels dans la chimiothérapie courte de la tuberculose. *Rev Mal Resp* 7: 209-213.
49. Chaulet P, Boulahbal F (1995) Essai clinique d'une combinaison en proportions fixes de trois médicaments dans le traitement de la tuberculose. *Tuberc Lung Dis* 76: 407-412.
